# Supplementary material
Source: publisher figshare collection journal article supplement (https://aacr.figshare.com/ndownloader/files/39991724)
Supplement: Supplementary file 1 [file 39991724]

## Activating HER2 mutations in HER2 gene amplification negative breast cancer

**Supplementary Table 1.** Previously published studies reporting HER2 somatic mutations in breast cancer. L755S was observed in two patients in the Lee et al. 2006 (1) study, as indicated by the parentheses. Similarly, S310F was observed in two patients in the Banerji et al. 2012 study (2). The sequencing methods employed in each used are as follows: Lee et al.2006 (1) – Sanger sequencing of ERBB2, Shah et al.2009 (3) – whole genome/exome sequencing on 1 patient followed by focused sequencing on 192 additional patients, Kan et al.2010 (4) – mismatch repair detection sequencing of 1,507 candidate genes in 156 breast cancer patients, Shah et al. 2012 (5), Stephens et al 2012 (6) and Banerji et al 2012 (2) – exome/whole genome sequencing of the indicated number of patients.

| Publication              | Number of HER2 mutations               | Number of patients screened            | Mutations identified                                                                                                                                       | Notes                     |
|--------------------------|----------------------------------------|----------------------------------------|------------------------------------------------------------------------------------------------------------------------------------------------------------|---------------------------|
| Lee et al. 2006 (1)      | 4                                      | 94                                     | L755S (2), R896C, del.755-759+S760A                                                                                                                        | Korean patient population |
| Shah et al. 2009 (3)     | 4<br>(3 in lobular breast cancer)      | 193<br>(113 are lobular breast cancer) | I767M, L755S, D769Y, del.755-759                                                                                                                           |                           |
| Kan et al. 2010 (4)      | 2                                      | 156                                    | G309E – found in a HER2+ patient<br>V777L – found in a hormone receptor+ patient                                                                           |                           |
| Shah et al. 2012 (5)     | 2<br>(both cases were Triple Negative) | 104                                    | S310F+L755S - two mutations present in 1 patient<br>Y835F                                                                                                  |                           |
| Stephens et al. 2012 (6) | 1<br>(this case was ER-, HER2-)        | 100                                    | P780-Y781insertionGSP                                                                                                                                      |                           |
| Banerji et al., 2012 (2) | 3                                      | 108                                    | S310F (2) – both patients are HER2-. One is ER+, lobular breast cancer. The other is a triple negative breast cancer.<br>G1201V – found in a HER2+ patient |                           |

Additional sequencing studies utilized here include: 1) Ellis et al., 2012 (7), which performed whole genome/exome sequencing on 77 patients and focused sequencing on 160 additional patients and 2) TCGA Breast Cancer project (8), which performed exome sequencing on 507 patients, 39 of whom had lobular breast cancer. Thus a total of 1,499 patients under genome or focused gene sequencing among these 8 studies.

## REFERENCES

1. Lee JW, Soung YH, Seo SH, Kim SY, Park CH, Wang YP, *et al.* Somatic mutations of ERBB2 kinase domain in gastric, colorectal, and breast carcinomas. *Clin Cancer Res* 2006;12:57-61.
2. Banerji S, Cibulskis K, Rangel-Escareno C, Brown KK, Carter SL, Frederick AM, *et al.* Sequence analysis of mutations and translocations across breast cancer subtypes. *Nature* 2012;486:405–9.

3. Shah SP, Morin RD, Khattra J, Prentice L, Pugh T, Burleigh A, *et al.* Mutational evolution in a lobular breast tumour profiled at single nucleotide resolution. *Nature* 2009;461:809-13.
4. Kan Z, Jaiswal BS, Stinson J, Janakiraman V, Bhatt D, Stern HM, *et al.* Diverse somatic mutation patterns and pathway alterations in human cancers. *Nature* 2010;466:869-73.
5. Shah SP, Roth A, Goya R, Oloumi A, Ha G, Zhao Y, *et al.* The clonal and mutational evolution spectrum of primary triple-negative breast cancers. *Nature* 2012;486:395–9.
6. Stephens PJ, Tarpey PS, Davies H, Van Loo P, Greenman C, Wedge DC, *et al.* The landscape of cancer genes and mutational processes in breast cancer. *Nature* 2012;486:400–4.
7. Ellis MJ, Ding L, Shen D, Luo J, Suman VJ, Wallis JW, *et al.* Whole Genome Sequencing to Characterise Breast Cancer Response to Aromatase Inhibition. *Nature* 2012;486:353–60.
8. The Cancer Genome Atlas Network. Comprehensive molecular portraits of human breast tumors. *Nature* 2012;490:61-70.
